# Supplementary material for: Floral Nectary Morphology and Proteomic Analysis of Nectar of Liriodendron tulipifera Linn
Source: Front Plant Sci. 2016 Jun 14;7:826. doi: 10.3389/fpls.2016.00826 (PMC4905952; doi:10.3389/fpls.2016.00826)
Supplement: Supplementary file 2 [file Table_2.XLSX]

## Sheet: Sheet1
Supplemental Table 2. Primer sequences for quantitative real-time PCR
Gene name	Contig name	Primer name	Sequence (5'-3')
Rubber elongation factor protein	LOC_Contig828_XA	LtREF-F	AACCGTCTACCGCTATTCCC
		LtREF-R	ACCTTCGCAATCCGTTCC
18SrRNA2		Lt18SrRNA2-F	ATTTCTGCCCTATCAACTTTCG
		Lt18SrRNA2-R	TTGTTATTTATTGTCACTACCTCCC
