# Supplementary material for: Floral Nectary Morphology and Proteomic Analysis of Nectar of Liriodendron tulipifera Linn
Source: Front Plant Sci. 2016 Jun 14;7:826. doi: 10.3389/fpls.2016.00826 (PMC4905952; doi:10.3389/fpls.2016.00826)
Supplement: Supplementary file 3 [file Table_3.XLSX]

## Sheet: Sheet1
Supplemental Table 3. Accession number of Liriodendron tulipifera REF orthologs.
	Protein Name	Protein ID	Species
	hypothetical protein AMTR_s00045p00206880	ERN02195.1	Amborella trichopoda
	Rubber elongation factor protein	NP_187201.1	Arabidopsis thaliana
	rubber elongation factor	AEX97052.1	Copaifera officinalis
	REF/SRPP-like protein	XP_010043058.1	Eucalyptus grandis
	rubber elongation factor	AAP57419.1	Hevea brasiliensis
	REF/SRPP-like protein At3g05500	XP_008359859.1	Malus domestica
	REF/SRPP-like protein At3g05500	XP_009626020.1	Nicotiana tomentosiformis
	REF/SRPP-like protein OsI_017815	A2Y0H2.1	Oryza sativa Indica
	predicted protein	EDQ55949.1	Physcomitrella patens
	unknown	ACN40923.1	Picea sitchensis
	hypothetical protein SORBIDRAFT_02g042550	EER97709.1	Sorghum bicolor
	rubber elongation factor family protein	XP_002319520.1	Populus trichocarpa
	hypothetical protein SELMODRAFT_146719	EFJ28900.1	Selaginella moellendorffii
	REF/SRPP-like protein At3g05500	XP_011092083.1	Sesamum indicum
	REF/SRPP-like protein At3g05500	XP_004230235.1	Solanum lycopersicum
	REF/SRPP-like protein At3g05500	XP_010546719.1	Tarenaya hassleriana
